1 Full Title: Population extinctions driven by climate change, population size, and time since observation  
2 may make rare species databases inaccurate

3

4 Short Title: Population extinctions may make databases inaccurate

5

6 Authors:

7 Thomas N. Kaye<sup>1,2</sup>

8 Matt A. Bahm<sup>1</sup>

9 Andrea S. Thorpe<sup>1,3</sup>

10 Erin C. Gray<sup>1</sup>

11 Ian Pfungsten<sup>4</sup>

12 Chelsea Waddell<sup>5</sup>

13

14 <sup>1</sup>Institute for Applied Ecology, 563 SW Jefferson Ave., Corvallis, Oregon, USA

15 <sup>2</sup>Corresponding author

16 <sup>3</sup>Current Affiliation: Washington Natural Heritage Program, Department of Natural Resources, PO Box

17 47014, Olympia, WA, USA

18 <sup>4</sup>Nonindigenous Aquatic Species Program, Cherokee Nation Technology Solutions, Wetland and Aquatic

19 Research Center, 7920 NW 71st Street, Gainesville, FL, USA

20 <sup>5</sup>Wildlife/Botany & Fisheries/Aquatics Data Coordinator, Branch of Biological Resources, United States

21 Bureau of Land Management, Oregon State Office, 1220 SW 3<sup>rd</sup> Avenue, Portland, OR, USA

22

23 **Abstract**

24 Loss of biological diversity through population extinctions is a global phenomenon that threatens many  
25 ecosystems. Managers often rely on databases of rare species locations to plan land use actions and  
26 conserve at-risk taxa, so it is crucial that the information they contain is accurate and dependable.  
27 However, climate change, small population sizes, and long gaps between surveys may be leading to  
28 undetected extinctions of many populations. We used repeated survey records for a rare but  
29 widespread orchid, *Cypripedium fasciculatum* (clustered lady's slipper), to model population extinction  
30 risk based on elevation, population size, and time between observations. Population size was negatively  
31 associated with extinction, while elevation and time between observations interacted such that low  
32 elevation populations were most vulnerable to extinction, but only over larger time spans. We interpret  
33 population losses at low elevations as a potential signal of climate change impacts. We used this model  
34 to estimate the probability of persistence of populations across California and Oregon, and found that  
35 31%-56% of the 2415 populations reported in databases from this region are likely extinct. Managers  
36 should be aware that the number of populations of rare species in their databases is potentially an  
37 overestimate, and consider resurveying these populations to document their presence and condition,  
38 with priority given to older reports of small populations, especially those at low elevations or in other  
39 areas with high climate vulnerability.

40

41

42

43

44

45

46 **Introduction**

47

48 Population extinctions are a major threat to plants, leading to range contractions, fragmentation and  
49 isolation [e.g., 1-4], which together reduce the abundance of species. As Darwin [5] pointed out, rarity is  
50 a precursor of extinction. Orchids in particular face a global conservation risk with high species diversity  
51 but also a high rate of species that are rare or threatened with extinction [6-12], and rare orchids are  
52 likely to need aggressive conservation actions to prevent their extinction [13]. Nearly half of the genus  
53 *Cypripedium* may be threatened and in need of protection if the species are to survive in the wild [14].  
54 Therefore, accurate assessments of the number of populations of a rare species and its major threats  
55 are crucial to conservation planning and resource allocation for recovery actions [15, 16].

56

57 Several processes can contribute to rare plant population extinctions, including habitat loss, interactions  
58 with invasive species, changes in disturbance frequency, etc. [17]. Climate change in particular is  
59 affecting species ranges globally [18], with organisms shifting toward higher latitudes [19] and  
60 elevations [20]. For example, plant ranges in western Europe have moved upslope at 29 m/decade over  
61 the last century [21] and in California at similar rates [22]. Climate change effects on temperature and  
62 moisture may threaten plant diversity in Europe, especially in mountains [23]. Low-elevation  
63 populations of organisms can be especially at risk of extirpation as climatic conditions change and force  
64 upslope range shifts [24]. Any contraction in the range of a rare species can have significant effects on  
65 its long term conservation and viability.

66

67 The number of individuals present can also affect the viability of plant populations, with small  
68 populations having greater risk of extirpation. In general, the extinction probability of a population  
69 increases as population size decreases [25, 26]. Small populations may be at greater risk of extinction

70 because of several factors, including losses in reproductive individuals [27], Allee effects [28], declines in  
71 seed production [29] and viability [30], loss of genetic diversity [31] and accumulation of genetic load  
72 [32], and demographic stochasticity [33]. In empirical studies that surveyed the same locations of  
73 multiple plant species over several years in Germany [4] and the Swiss Jura Mountains [34], extinction  
74 rates were found to be higher for small populations. And although population size may be a strong  
75 predictor of population vulnerability, passage of time can compound the likelihood of extinction  
76 because as more time passes in stochastic environments the chances that a population will fall to zero  
77 increase [25, 26].

78  
79 Taken together, climate change, population size, and time since observation create considerable  
80 uncertainty regarding the current status of wild plant populations recorded in various rare species  
81 databases. Several US agencies and organizations (e.g., US Bureau of Land Management, US Fish and  
82 Wildlife Service, US Forest Service, NatureServe, state Natural Heritage Programs) maintain databases of  
83 rare plant occurrences and many of these occurrences may not have been visited recently. Therefore,  
84 the number of populations in the wild of some species could be smaller than the number listed in  
85 databases due to extinctions that have not yet been detected. Increasing our ability to estimate the  
86 number of populations that remain extant or have gone extinct in these data bases will improve  
87 conservation planning for rare species. We used information on repeated surveys in California and  
88 Oregon for a rare but widespread orchid, *Cypripedium fasciculatum* (clustered lady's slipper), to test the  
89 hypothesis that extinction probability is affected by elevation, population size, and time since  
90 observation. We applied the resulting model to populations in Oregon and California in the Geographic  
91 Biotic Observations (GeoBOB) data base maintained by the US Bureau of Land Management and the US  
92 Forest Service Natural Resource Information System (NRIS-Terra) to estimate the number of populations  
93 that are still extant.

94

95 **Materials and methods**

96

97 Study species

98

99 *Cypripedium fasciculatum* (clustered ladies slipper; Figure 1) occurs in scattered population centers in  
100 western North America in California, Oregon, Washington, Idaho, Montana, Utah, Wyoming and  
101 Colorado. In California and Oregon, this taxon occurs predominantly in the Klamath-Siskiyou Mountains  
102 and Sierra Nevada Mountains. The United States Forest Service (USFS) considers it to be a Sensitive  
103 Species and the Bureau of Land Management (BLM) lists it as a Bureau Sensitive Species, and it is  
104 considered globally secure because of its widespread geographic range and abundance in some states  
105 [35]. In California and Oregon the species is most often found on north facing slopes in mixed  
106 coniferous forests of >60% canopy closure [36]. *Pseudotsuga menziesii* is the most common associated  
107 tree, but other frequently noted forest components include *Abies concolor*, *Cornus nuttallii*, *Pinus*  
108 *lambertiana*, and *Calocedrus decurrens*. Clustered lady's slipper is known to occur in California and  
109 Oregon at elevations from about 180 to nearly 2000 m. The species has a complex life-history and  
110 depends on specific mycorrhizal fungi [37], which may affect its seed germination and growth.  
111 Mycorrhizal fungi may determine where and in which specific habitats this orchid can grow and how it  
112 responds to disturbance, but little information is available on the fungi, their requirements, associated  
113 tree species, and their function in forest ecosystems [36].

114

115 **Figure 1. *Cypripedium fasciculatum* (clustered lady's slipper).**

116

117 Data sources

118

119 We compiled repeated-survey data from multiple sources to test for effects of elevation, time between  
120 surveys, and population size on extinction probability. The sources of these resurvey data were from an  
121 assessment of the conservation status of *C. fasciculatum* in California that reviewed available records  
122 (78 sites) for the species throughout that state [36] and from repeated surveys in southwestern Oregon  
123 (158 sites) conducted on federal lands. Both resurvey data sources (236 populations combined)  
124 included sites revisited at least once and documented site location, elevation, population size, and time  
125 between surveys. We used information on population size from the first survey, and time between  
126 surveys was calculated as the number of years between the first and last (most recent) survey. The last  
127 survey was used to score each population as either extant or extinct (no individual plants found at the  
128 site). The time between surveys ranged from 1 to 29 years. While most observers censused  
129 populations, some estimated population size, and when this occurred we used the highest integer  
130 reported for a population during the first survey. For example, if 50-100 plants were reported, we used  
131 100. If the number was vague (e.g., 75+, >30, or ca. 50) we used the actual integer listed (75, 30, or 50,  
132 respectively). Populations used in the analysis varied in size from 1 to 1084 individuals. *C. fasciculatum*  
133 plants that were single stems or clumps were considered individuals [following 40].

134

### 135 Population Viability Analysis

136

137 We used a generalized linear model with quasibinomial errors to estimate extinction probability. The  
138 response variable was population status at the most recent visit (a binomial response, either extinct or  
139 extant) and independent variables were size of the population at the first survey, elevation of the  
140 population, and number of years between the first and last survey. All analyses were performed in R  
141 3.3.2 [R Core Development Team, [www.cran-r.org](http://www.cran-r.org)].

142

143 Estimating extant population number

144

145 To estimate the number of populations of *C. fasciculatum* recorded as still extant in the GeoBOB and

146 NRIS-Terra databases for California and Oregon, we applied our statistical model for predicting

147 extinction probability to each of the 2896 populations recorded based on their elevation, size and years

148 since the last survey. To estimate uncertainty, we bootstrapped the parameters in the model from our

149 resurvey data set of 236 populations by randomly selecting 236 populations from this group, with

150 replacement, and estimating the generalized linear model parameters. For each bootstrapped set of

151 parameters, we calculated the extinction probability of each population in the GeoBOB and NRIS-Terra

152 databases, summed those probabilities to estimate the number of extant populations, and repeated this

153 bootstrap process 10,000 times to estimate 95% confidence limits. We performed this analysis in R

154 3.3.2.

155

## 156 **Results**

157

### 158 Population Viability Analysis

159

160 Of the 236 populations in our data sets, we found 34% were no longer present when revisited.

161 Elevation, time between surveys, and population size were each significant factors for predicting

162 extinction probability of populations (Table 1). Probability of extinction was best explained by all of

163 these factors, including a significant ( $p < 0.001$ ) interaction between elevation and years between

164 surveys. The general linear model suggested that populations at lower elevations were more likely to go

165 extinct than high elevation populations, but only as the length of time between surveys increased

166 (Figure 2, right). Small populations had a greater probability of extinction than large populations, and  
167 extinction probability was near zero for populations with >100 individuals (Figure 2, left), regardless of  
168 the length of time between samples. Further, extinction probability increased as the time between  
169 surveys increased, most notably for smaller populations.

170

171 Table 1. Generalized linear model for factors affecting the probability of population survival for *C.*

172 *fasciculatum*.

173

| Factor                               | Estimate | Standard Error | t value | <i>P</i> |
|--------------------------------------|----------|----------------|---------|----------|
| (Intercept)                          | 1.75     | 1.03           | 1.70    | 0.091    |
| Starting population size             | 0.09     | 0.02           | 4.36    | <0.001   |
| Years between surveys                | -0.38    | 0.1            | -3.81   | <0.001   |
| Elevation                            | -0.0002  | 0.0003         | -0.713  | 0.476    |
| Years between surveys<br>X Elevation | 0.00008  | 0.00003        | 2.76    | 0.006    |

174

175

176

177 **Figure 2. Extinction probability as a function of population size (left) and the interaction between**  
178 **elevation (m) and time (years) between surveys (right, with each line representing an example of a**  
179 **specific time interval between surveys. Shadings around each line represent 95% confidence**  
180 **intervals.**

181

182 Estimating extant populations



183

184 A total of 2415 populations with one or more plants were reported in the GeoBOB and NRIS-Terra  
185 databases for Oregon and California. An additional 426 populations were reported as already extinct by  
186 2016. Populations in that database ranged in size from 1 to 1859 individuals, with a mean population  
187 size of 27 (95% CI  $\pm$  1.6). We estimated that of the 2415 populations reported as extant, only 1,349  
188 (95% bootstrapped quantiles: 1213-1486) were likely still present. This is equivalent to an overall  
189 extinction rate of 44% (95% bootstrapped quantiles: 38%-50%). The predicted probability of population  
190 survival varied widely across the landscape in California and Oregon, with some population centers  
191 showing greater potential for population extinction than others (Figure 3). For example, populations in  
192 southwestern Oregon had a predicted extinction rate of 60% (53% – 67%) of 1258 reports compared to  
193 27% (19% - 35%) of 1157 records in California. This difference was driven in our model by the generally  
194 lower population sizes in Oregon (mean: 12.7 95% CI:  $\pm$  1.5) than California (37.9  $\pm$  6.6) and lower  
195 elevations of populations in Oregon (757.2m  $\pm$  13.4m) than California (1319.2m  $\pm$  15.4m). Years  
196 between observations did not differ between states, averaging 15.4 years overall ( $\pm$  0.39).

197

198 **Figure 3. Distribution of *Cypripedium fasciculatum* in the western United States (inset), with map of**  
199 **California and Oregon showing the probability of persistence estimated from elevation, population**  
200 **size, and time since observation.**

201

## 202 Discussion

203

204 We found that elevation, population size, and time between surveys predicted extinction in *Cypripedium*  
205 *fasciculatum*. When these factors were used to model the persistence of wild populations, we found  
206 that only 56% of populations reported in the GeoBOB and NRIS-Terra databases for California and

207 Oregon are likely still present on the landscape. Extinction rates are predicted to be higher in Oregon  
208 than in California, primarily due to the lower average population size and elevation there. Our results  
209 suggest that negative impacts from climate change might already be apparent for *C. fasciculatum*  
210 through extinction of low elevation populations. Loss of low elevation populations may be expected  
211 when climates warm to the point that populations can no longer survive in the hotter portions of their  
212 range. For example, loss of butterfly species at low elevations has been attributed to warming trends in  
213 Spain [39]. Our findings with *C. fasciculatum* are generally consistent with orchid responses to climate  
214 change in North America and elsewhere. Documented declines of species in the Orchidaceae in eastern  
215 North America appear to be related, at least in part, to an inability of these species to alter their  
216 phenology, particularly flowering time, as climate has warmed over the last century and a half [40].  
217 Climate change appears to be a threat to orchids in Mexico [41], and orchids in general appear to be  
218 highly vulnerable to climate change in China [42]. In contrast, orchids were more likely to increase  
219 abundance in Mediterranean France from 1886-2001 compared to many other plant taxonomic groups  
220 [43]. Precipitation appears to be a strong driver of plant survival in *C. reginae* [44], making the species  
221 vulnerable to changes in regional climate. And it is clear that climate has changed recently and is  
222 forecasted to change further in California and Oregon, in part due to warming and drying that, when  
223 combined, exacerbate moisture deficits and increased evaporative demand [e.g., 45].  
224  
225 Many orchid species have populations with a wide range of sizes [46], and small average population  
226 sizes are common. In the GeoBOB and NRIS databases of 2415 populations of *Cypripedium fasciculatum*  
227 in California and Oregon that we reviewed, the average population size was 25 individuals. The average  
228 population size of *C. kentuckiense* is 40 individuals, *C. calceolus* in Europe generally has populations with  
229 fewer than 100 plants, and *C. dickensonianum* occurs as small colonies or individuals [47]. As population  
230 size declines in orchid species, gene flow by pollen may decline [48], inbreeding may increase [49],

231 pollination, fruit set and seedling recruitment may decrease [50], genetic drift may increase [51], and  
232 genetic diversity may decline [52]. Transition matrix models of *C. calceolus* [53] indicate extinction  
233 probability over a 100 year period in populations with 10 plants is 37%, and in populations with 5 plants  
234 it increases to 67% without disturbance. In populations where flowers are removed or plants are dug  
235 up, extinction probability rapidly approaches 100%. The typically low population size in *C. fasciculatum*  
236 was a major contributor to the high rate of predicted extinctions we have shown for the species.

237

238 Population extinction probability was associated with time between surveys in *C. fasciculatum*. In  
239 stochastic environments, even populations with stable intrinsic population growth rates are vulnerable  
240 to extinction, and this vulnerability increases with time [25, 26]. In populations with declining growth  
241 rates, the rate of extinction will be even faster. Therefore, as time between surveys increases,  
242 population extinction should also increase, especially for small populations. Surprisingly, time between  
243 surveys had no significant effect on probability of extinction in eight rare plants in Germany [4], but the  
244 study was conducted over a relatively short period (ten years).

245

246 Resurveys of plant populations and communities can provide substantial insights into the nature and  
247 causes of changes that occur in the natural world over time [54-57]. Even so, there are some limitations  
248 to our estimates of extinction probability of *C. fasciculatum* in this study. Repeated surveys may fail to  
249 relocate previously documented populations even when they are still present [58-60] if the survey is not  
250 sufficiently thorough. The datasets we used contained information on population resurveys that were  
251 carefully conducted with precise location information, but the possibility remains that some extant  
252 populations may have been missed. This could be aggravated by individual plant dormancy, which  
253 would make plants very difficult to detect during surveys, and if all plants in a population were dormant  
254 at the same time – a possibility that increases as population size declines – whole extant but dormant

255 populations could be falsely classified as extinct. Dormancy above ground is not uncommon in  
256 terrestrial orchids [61], including *Cypripedium* [38, 62-66]. *Cypripedium reginae*, for example, may be  
257 dormant for up to four years [44]. On the other hand, dormancy is associated with decreased orchid  
258 reproduction [67] and survival [68], and if all individuals in a population were dormant, the population  
259 might already be close to extinction. These factors suggest that although we could have overestimated  
260 extinction probability [58] due to dormancy, this same dormancy could suggest increased plant  
261 vulnerability. Either way, we are unable to quantify this potential bias in our results given the available  
262 data.

263  
264 Because orchids depend on fungi, at least in the early stages of plant development, the presence of  
265 appropriate fungi and the environmental factors that affect them may in turn determine the growth and  
266 survival of many orchids [69], including *C. fasciculatum* populations. Soil and topography, and especially  
267 temperature and moisture are the most important factors that control orchid distribution and survival  
268 [70], and this may be due to the influence of these factors on mycorrhizal fungi. *Cypripedium* spp. are  
269 associated with fungi in the Sebacinaceae, Ceratobasidiaceae, and especially the Tulasnellaceae [37].  
270 The degree of specificity of orchids with fungi is significant because orchids with highly specific  
271 associations may be more sensitive to disturbance and environmental change than generalist species  
272 [71]. Further, climate and fungal symbionts of orchids may interact to shape the evolutionary response  
273 of specific vital rates to climate change, such as sprouting after dormancy [72].

274  
275 Implications for conservation

276  
277 This study demonstrates the need for additional and more frequent surveys of rare plant populations to  
278 improve the reliability of information in databases used by land management agencies. Land managers

279 who make decisions on how best to conserve rare species often base their decisions in part on the  
280 abundance and distribution of those organisms as reported in databases. However, many reported  
281 populations may no longer be extant. Managers should be aware that the number of populations of  
282 rare species in their databases is potentially an overestimate, and consider resurveying populations in  
283 databases to document their presence and condition, with priority given to older reports of small  
284 populations, especially those at low elevations or other areas with high climate vulnerability. Species  
285 like *C. fasciculatum* may be candidates for assisted migration [73-75] as their low-elevation populations  
286 experience extinction and if expansion or colonization at higher elevation locations does not occur  
287 naturally. We suggest that development of propagation and planting techniques [e.g., 76-78] to allow  
288 for intervention is warranted, and needs to consider the fungal dependency of this rare orchid [79].

289

## 290 **Acknowledgments**

291

292 The authors gratefully acknowledge the contributions and cooperation by the Medford District Bureau  
293 of Land Management, especially Bryan Wender and Mark Mousseaux, who compiled database records  
294 for the species regionally. Support was also provided the Rogue-Siskiyou National Forest and facilitated  
295 by Wayne Rolle and Barb Mumblo. Staff of the Institute for Applied Ecology assisted with this project,  
296 including Carolyn Menke who made the maps used in this paper, and Amanda Stanley and Heather Root  
297 who provided statistical support.

298

## 299 **References**

- 300 1. Oostermeijer JGB. Threats to rare plant persistence. In: Brigham CA, Schwartz MW, editors.  
301 Population Viability in Plants: Conservation, Management, and Modeling of Rare Plants. Berlin:  
302 Springer; 2003. pp. 17-58.

- 303 2. Harrison S, Bruna E. Habitat fragmentation and large-scale conservation: what do we know for  
304 sure? *Ecography* 1999;22: 225-232.
- 305 3. Kéry M, Matthies D, Spillmann H. Reduced fecundity and offspring performance in small  
306 populations of the declining grassland plants *Primula veris* and *Gentiana lutea*. *J Ecol.* 2000;88:  
307 17-30.
- 308 4. Matthies D, Bräuer I, Maibom W, Tschardt T. Population size and the risk of local extinction:  
309 empirical evidence from rare plants. *Oikos* 2004;105: 481-488.
- 310 5. Darwin C. On the origins of species by means of natural selection or the preservation of  
311 favoured races in the struggle for life [reprinted 1964]. Cambridge: Harvard University Press;  
312 1859.
- 313 6. Koopowitz H. A stochastic model for the extinction of tropical orchids. *Selbyana* 1992;13: 115-  
314 122.
- 315 7. Solow AR. Inferring extinction from sighting data. *Ecol.* 1993;74: 962-964.
- 316 8. Cribb PJ, Kell SP, Dixon KW, Barrett RL. Orchid conservation: A global perspective. In: Dixon KW,  
317 Kell SP, Barrett RL, Cribb PJ, editors. *Orchid conservation*. Kota Kinabalu: Natural History  
318 Publications; 2003. pp. 1-24.
- 319 9. Solow AR, Roberts DL. A nonparametric test for extinction based on a sighting record. *Ecol.*  
320 2003;84: 1329-1332.
- 321 10. Pokorny J, Raynal-Roques A, Roguenant A, Prat D. Degree of threat of extinction and causes of  
322 disappearance, of the Orchidaceae in the Sudeten Mountains (Poland). In: Raynal-Roques A,  
323 Roguenant A, Prat D. editor, *Proceedings of the 18th World Orchid Conference*. Turreirs:  
324 Naturalia Publications; 2005. pp. 399-402.
- 325 11. Duffy KJ, Kingston NE, Sayers BA, Roberts DL, Stout JC. Inferring national and regional declines of  
326 rare orchid species with probabilistic models. *Conserv Biol.* 2009;23: 184-195.

- 327 12. Swarts ND, Dixon KW. Terrestrial orchid conservation in the age of extinction. *Ann Bot.*  
328 2009;104: 543-556.
- 329 13. Pierce S, Ceriani RM, Villa M, Cerabolini B. Quantifying relative extinction risks and targeting  
330 intervention for the orchid flora of a natural park in the European Prealps. *Conserv Biol.*  
331 2006;20: 1804-1810.
- 332 14. Cribb P, Sandison MS. A preliminary assessment of the conservation status of *Cypripedium*  
333 species in the wild. *Bot J Linn Soc.* 1998;126: 183-190.
- 334 15. Schemske DW, Husband BC, Ruckelshaus MH, Goodwillie C, Parker IM, Bishop JG. Evaluating  
335 approaches to the conservation of rare and endangered plants. *Ecol.* 1994;75: 584-606.
- 336 16. Lawler JJ, Campbell SP, Guerry AD, Kolozsvary MB, O'Connor RJ, Seward LC. The scope and  
337 treatment of threats in endangered species recovery plans. *Ecol Appl.* 2002;12: 663-667.
- 338 17. Wilcove DS, Rothstein D, Dubow J, Phillips A, Losos E. Quantifying threats to imperiled species in  
339 the United States. *BioSci.* 1998;48: 607-615.
- 340 18. Parmesan C. Ecological and evolutionary responses to recent climate change. *Annu Rev Ecol Evol*  
341 *Syst.* 2006;37: 637-669.
- 342 19. Parmesan C, Yohe G. A globally coherent fingerprint of climate change impacts across natural  
343 systems. *Nature* 2003;421: 37-42.
- 344 20. Chen IC, Hill JK, Ohlemüller R, Roy DB, Thomas CD. Rapid range shifts of species associated with  
345 high levels of climate warming. *Science* 2011;333: 1024-1026.
- 346 21. Lenoir J, Gégout JC, Marquet PA, De Ruffray P, Brisse H. A significant upward shift in plant  
347 species optimum elevation during the 20th century. *Science* 2008;320: 1768-1771.
- 348 22. Kelly AE, Goulden ML. Rapid shifts in plant distribution with recent climate change. *Proc Natl*  
349 *Acad Sci U S A.* 2008;105: 11823-11826.

- 350 23. Thuiller W, Lavorel S, Araújo MB, Sykes MT, Prentice IC. Climate change threats to plant diversity  
351 in Europe. *Proc Natl Acad Sci U S A*. 2005;102: 8245-8250.
- 352 24. Colwell RK, Brehm G, Cardelús CL, Gilman AC, Longino JT. Global warming, elevational range  
353 shifts, and lowland biotic attrition in the wet tropics. *Science* 2008;322: 258-261.
- 354 25. Caswell H. *Matrix Population Models*. Sunderland: Sinauer Associates; 1989.
- 355 26. Morris WF, Doak DF *Quantitative conservation biology: theory and practice of population*  
356 *viability analysis*. Sunderland: Sinauer Associates; 2002.
- 357 27. Eisto AK, Kuitunen M, Lammi A, Saari V, Suhonen J, Syrjäsoo S, Tikka PM. Population persistence  
358 and offspring fitness in the rare bellflower *Campanula cervicaria* in relation to population size  
359 and habitat quality. *Conserv Biol*. 2000;14: 1413-1421.
- 360 28. Berc L, Angulo E, Courchamp F. Multiple Allee effects and population management. *Trends Ecol*  
361 *Evol*. 2007;22: 185-191.
- 362 29. Thorpe AS, Kaye TN. Conservation and reintroduction of the endangered Willamette daisy:  
363 effects of population size on seed viability and the influence of local adaptation. *Native Plants J*.  
364 2011;12: 289-298.
- 365 30. Menges ES. Seed germination percentage increases with population size in a fragmented prairie  
366 species. *Conserv Biol*. 1991;5: 158-164.
- 367 31. Fischer M, Matthies D. Effects of population size on performance in the rare plant *Gentianella*  
368 *germanica*. *J Ecol*. 1998;86: 195-204.
- 369 32. Paland S, Schmid B. Population size and the nature of genetic load in *Gentianella germanica*.  
370 *Evol*. 2003;57: 2242-2251.
- 371 33. Lande R. Risks of population extinction from demographic and environmental stochasticity and  
372 random catastrophes. *Am Nat*. 1993;142: 911-927.



- 373 34. Fischer M, Stöcklin J. Local extinctions of plants in remnants of extensively used calcareous  
374 grasslands 1950–1985. *Conserv Biol.* 1997;11: 727-737.
- 375 35. NatureServe. NatureServe Explorer: An online encyclopedia of life [web application]. Version  
376 7.1. NatureServe, Arlington, Virginia. 2017. Available <http://explorer.natureserve.org>., Cited 21  
377 February 2018.
- 378 36. Kaye TN, Cramer JR. Conservation Assessment for *Cypripedium fasciculatum* and *Cypripedium*  
379 *montanum*. Sacramento: USDA Forest Service, Region 5. 2005. Available from:  
380 [https://appliedeco.org/wp-content/uploads/cypripedium\\_ca\\_2005\\_final1.pdf](https://appliedeco.org/wp-content/uploads/cypripedium_ca_2005_final1.pdf)
- 381 37. Shefferson RP, Weiss M, Kull T, Taylor DL. High specificity generally characterizes mycorrhizal  
382 association in rare lady's slipper orchids, genus *Cypripedium*. *Mol Ecol.* 2005;14: 613-626.
- 383 38. Nicole F, Brzosko E, TILL-BOTTRAUD IRÈNE. Population viability analysis of *Cypripedium calceolus*  
384 in a protected area: longevity, stability and persistence. *J Ecol.* 2005;93: 716-726.
- 385 39. Wilson RJ, Gutiérrez D, Gutiérrez J, Martínez D, Agudo R, Monserrat VJ. Changes to the  
386 elevational limits and extent of species ranges associated with climate change. *Ecol Lett.* 2005;8:  
387 1138-1146.
- 388 40. Willis CG, Ruhfel B, Primack RB, Miller-Rushing AJ, Davis CC. Phylogenetic patterns of species  
389 loss in Thoreau's woods are driven by climate change. *Proc Natl Acad Sci U S A.* 2008;105:  
390 17029-17033.
- 391 41. Soto-Arenas M, Gómez RS, Hågsater E. Risk of extinction and patterns of diversity loss in  
392 Mexican orchids. *Lankesteriana* 2007;7: 1-2.
- 393 42. Liu H, Feng CL, Luo YB, Chen BS, Wang ZS, Gu HY. Potential challenges of climate change to  
394 orchid conservation in a wild orchid hotspot in southwestern China. *Bot Rev.* 2010;76: 174-192.
- 395 43. Lavergne S, Molina J, Debussche MAX. Fingerprints of environmental change on the rare  
396 mediterranean flora: A 115-year study. *Glob Chang Biol.* 2006;12: 1466-1478.

- 397 44. Kéry M, Gregg KB. Demographic analysis of dormancy and survival in the terrestrial orchid  
398 *Cypripedium reginae*. *J Ecol.* 2004;92: 686-695.
- 399 45. Mann EM, Gleich PH. Climate change and California drought in the 21st century. *Proc Natl Acad*  
400 *Sci U S A.* 2015;112: 3858-3859.
- 401 46. Gillman MP, Dodd ME. The variability of orchid population size. *Bot J Linn Soc.* 1998;126: 65-74.
- 402 47. IUCN Red List of Threatened Species, *Cypripedium kentuckiense* (Kentucky Lady's Slipper,  
403 Southern Lady's Slipper, Southern Yellow Lady's Slipper). [dx.doi.org/10.2305/IUCN.UK.2014-](https://dx.doi.org/10.2305/IUCN.UK.2014-1.RLTS.T13254117A13254142.en)  
404 [1.RLTS.T13254117A13254142.en](https://dx.doi.org/10.2305/IUCN.UK.2014-1.RLTS.T13254117A13254142.en) Cited 9 December 2016.
- 405 48. Alexandersson R, Ågren J. Population size, pollinator visitation and fruit production in the  
406 deceptive orchid *Calypso bulbosa*. *Oecologia* 1996;107: 533-540.
- 407 49. Johnson SD, Torninger E, Ågren J. Relationships between population size and pollen fates in a  
408 moth-pollinated orchid. *Biol Lett.* 2009;5: 282-285.
- 409 50. Jacquemyn H, Vandepitte K, Brys R, Honnay O, Roldán-Ruiz I. Fitness variation and genetic  
410 diversity in small, remnant populations of the food deceptive orchid *Orchis purpurea*. *Biol*  
411 *Conserv.* 2007;139: 203-210.
- 412 51. Chung MY, Nason JD, Chung MG. Implications of clonal structure for effective population size  
413 and genetic drift in a rare terrestrial orchid, *Cremastra appendiculata*. *Conserv Biol.* 2004;18:  
414 1515-1524.
- 415 52. Jacquemyn H, Brys R, Adriaens D, Honnay O, Roldán-Ruiz I. Effects of population size and forest  
416 management on genetic diversity and structure of the tuberous orchid *Orchis mascula*. *Conserv*  
417 *Genet.* 2009;10: 161-168.
- 418 53. Devillers-Terschuren J. Action plan for *Cypripedium calceolus* in Europe. *Nature and*  
419 *Environment*, no. 100. Strasbourg: Council of Europe Publishing; 1992.

- 420 54. Harrison S, Maron J, Huxel G. Regional turnover and fluctuation in populations of five plants  
421 confined to serpentine seeps. *Conserv Biol.* 2000;14: 769-779.
- 422 55. Wiegmann SM, Waller DM. Fifty years of change in northern upland forest understories: identity  
423 and traits of “winner” and “loser” plant species. *Biol Conserv.* 2006;129: 109-123.
- 424 56. Damschen EI, Harrison S, Grace JB. Climate change effects on an endemic-rich edaphic flora:  
425 resurveying Robert H. Whittaker's Siskiyou sites (Oregon, USA). *Ecol.* 2010;91: 3609-3619.
- 426 57. Waller DM, Amatangelo KL, Johnson S, Rogers DA. Wisconsin Vegetation Database—plant  
427 community survey and resurvey data from the Wisconsin Plant Ecology Laboratory. *Biodivers*  
428 *Ecol.* 2012;4: 255-264.
- 429 58. Kéry M, Spillmann JH, Truong C, Holderegger R. How biased are estimates of extinction  
430 probability in revisitation studies? *J Ecol.* 2006;94: 980–986.
- 431 59. Chen G, Kéry M, Zhang J, Ma K. Factors affecting detection probability in plant distribution  
432 studies. *J Ecol.* 2009;97: 1383-1389.
- 433 60. Tingley MW, Beissinger SR. Detecting range shifts from historical species occurrences: New  
434 perspectives on old data. *Trends Ecol Evol.* 2009;24: 625-633.
- 435 61. Kull T. Population dynamics of north temperate orchids. In: Kull T, Arditti J, editors. *Orchid*  
436 *Biology: Reviews and Perspectives, VIII.* Dordrecht: Kluwer Academic Publishers; 2002. pp. 139–  
437 165.
- 438 62. Cochran ME, Ellner S. Simple methods for calculating age-based life history parameters for  
439 stage-structured populations. *Ecol Monogr.* 1992;62: 345–364.
- 440 63. Shefferson RP, Sandercock BK, Proper J, Beissinger SR Estimating dormancy and survival of a  
441 rare herbaceous perennial using mark–recapture models. *Ecol.* 2001;82: 145–156.
- 442 64. Shefferson RP, Proper J, Beissinger SR, Simms EL. Life history trade-offs in a rare orchid: the  
443 costs of flowering, dormancy, and sprouting. *Ecol.* 2003;84: 1199–1206.

- 444 65. Brzosko E. Dynamics of island populations of *Cypripedium calceolus* in the Biebrza River valley  
445 (north-east Poland). *Bot J Linn Soc.* 2002;139: 67–77.
- 446 66. Shefferson RP. Survival costs of adult dormancy and the confounding influence of size in lady's  
447 slipper orchids, genus *Cypripedium*. *Oikos* 2006;115: 253–262.
- 448 67. Kaye TN. Timber harvest and *Cypripedium montanum*: Results of a long-term study on the  
449 Medford District BLM. Institute for Applied Ecology, Corvallis, Oregon. 1999. Available from:  
450 [http://appliedeco.org/wp-content/uploads/cypripedium\\_montanum\\_logging.pdf](http://appliedeco.org/wp-content/uploads/cypripedium_montanum_logging.pdf)
- 451 68. Shefferson, R. P., Tali, K., 2007. Dormancy is associated with decreased adult survival in the  
452 burnt orchid, *Neotinea ustulata*. *J Ecol.* 2007;95: 217-225.
- 453 69. Rock-Blake R, McCormick MK, Brooks HE, Jones CS, Whigham DF. Symbiont abundance can  
454 affect host plant population dynamics. *Am J Bot.* 2017;104: 72-82.
- 455 70. Correll DS. Native orchids of North America north of Mexico. Stanford: Stanford University  
456 Press; 1978.
- 457 71. McCormick MK, Whigham DF, O'Neill J. Mycorrhizal diversity in photosynthetic terrestrial  
458 orchids. *New Phytol.* 2004;163: 425-438.
- 459 72. Shefferson RP, Mizuta R, Hutchings MJ. Predicting evolution in response to climate change: the  
460 example of sprouting probability in three dormancy-prone orchid species. *R Soc Open Sci.*  
461 2017;4: 160647. <http://dx.doi.org/10.1098/rsos.160647>
- 462 73. McLachlan JS, Hellmann JJ, Schwartz MW. A framework for debate of assisted migration in an  
463 era of climate change. *Conserv Biol.* 2007;21: 297–302.
- 464 74. Vitt P, Havens K, Kramer AT, Sollenberger D, Yates E. Assisted migration of plants: Changes in  
465 latitudes, changes in attitudes. *Biological Conserv.* 2010;143: 18-27.
- 466 75. Hällfors MH, Aikio S, Schulman LE. Quantifying the need and potential of assisted migration.  
467 *Biological Conserv.* 2017;205: 34-41.

- 468 76. Ramsay MM, Stewart J. Re-establishment of the lady's slipper orchid (*Cypripedium calceolus* L.)  
469 in Britain. *Bot J Linn Soc.* 1998;126: 173-181.
- 470 77. Huber AG. Mountain Lady's Slipper (*Cypripedium montanum*): Establishment from seeds in  
471 forest openings. *Native Plants J.* 2002;3: 151-154.
- 472 78. Yan N, Hu H, Huang JL, Xu K, Wang H, Zhou ZK. Micropropagation of *Cypripedium flavum*  
473 through multiple shoots of seedlings derived from mature seeds. *Plant Cell Tissue Organ Cult.*  
474 2006;84: 114-118.
- 475 79. Kranabetter JM, Stoehr M, O'Neill GA. Ectomycorrhizal fungal maladaptation and growth  
476 reductions associated with assisted migration of Douglas-fir. *New Phytol.* 2015;206: 1135-1144.

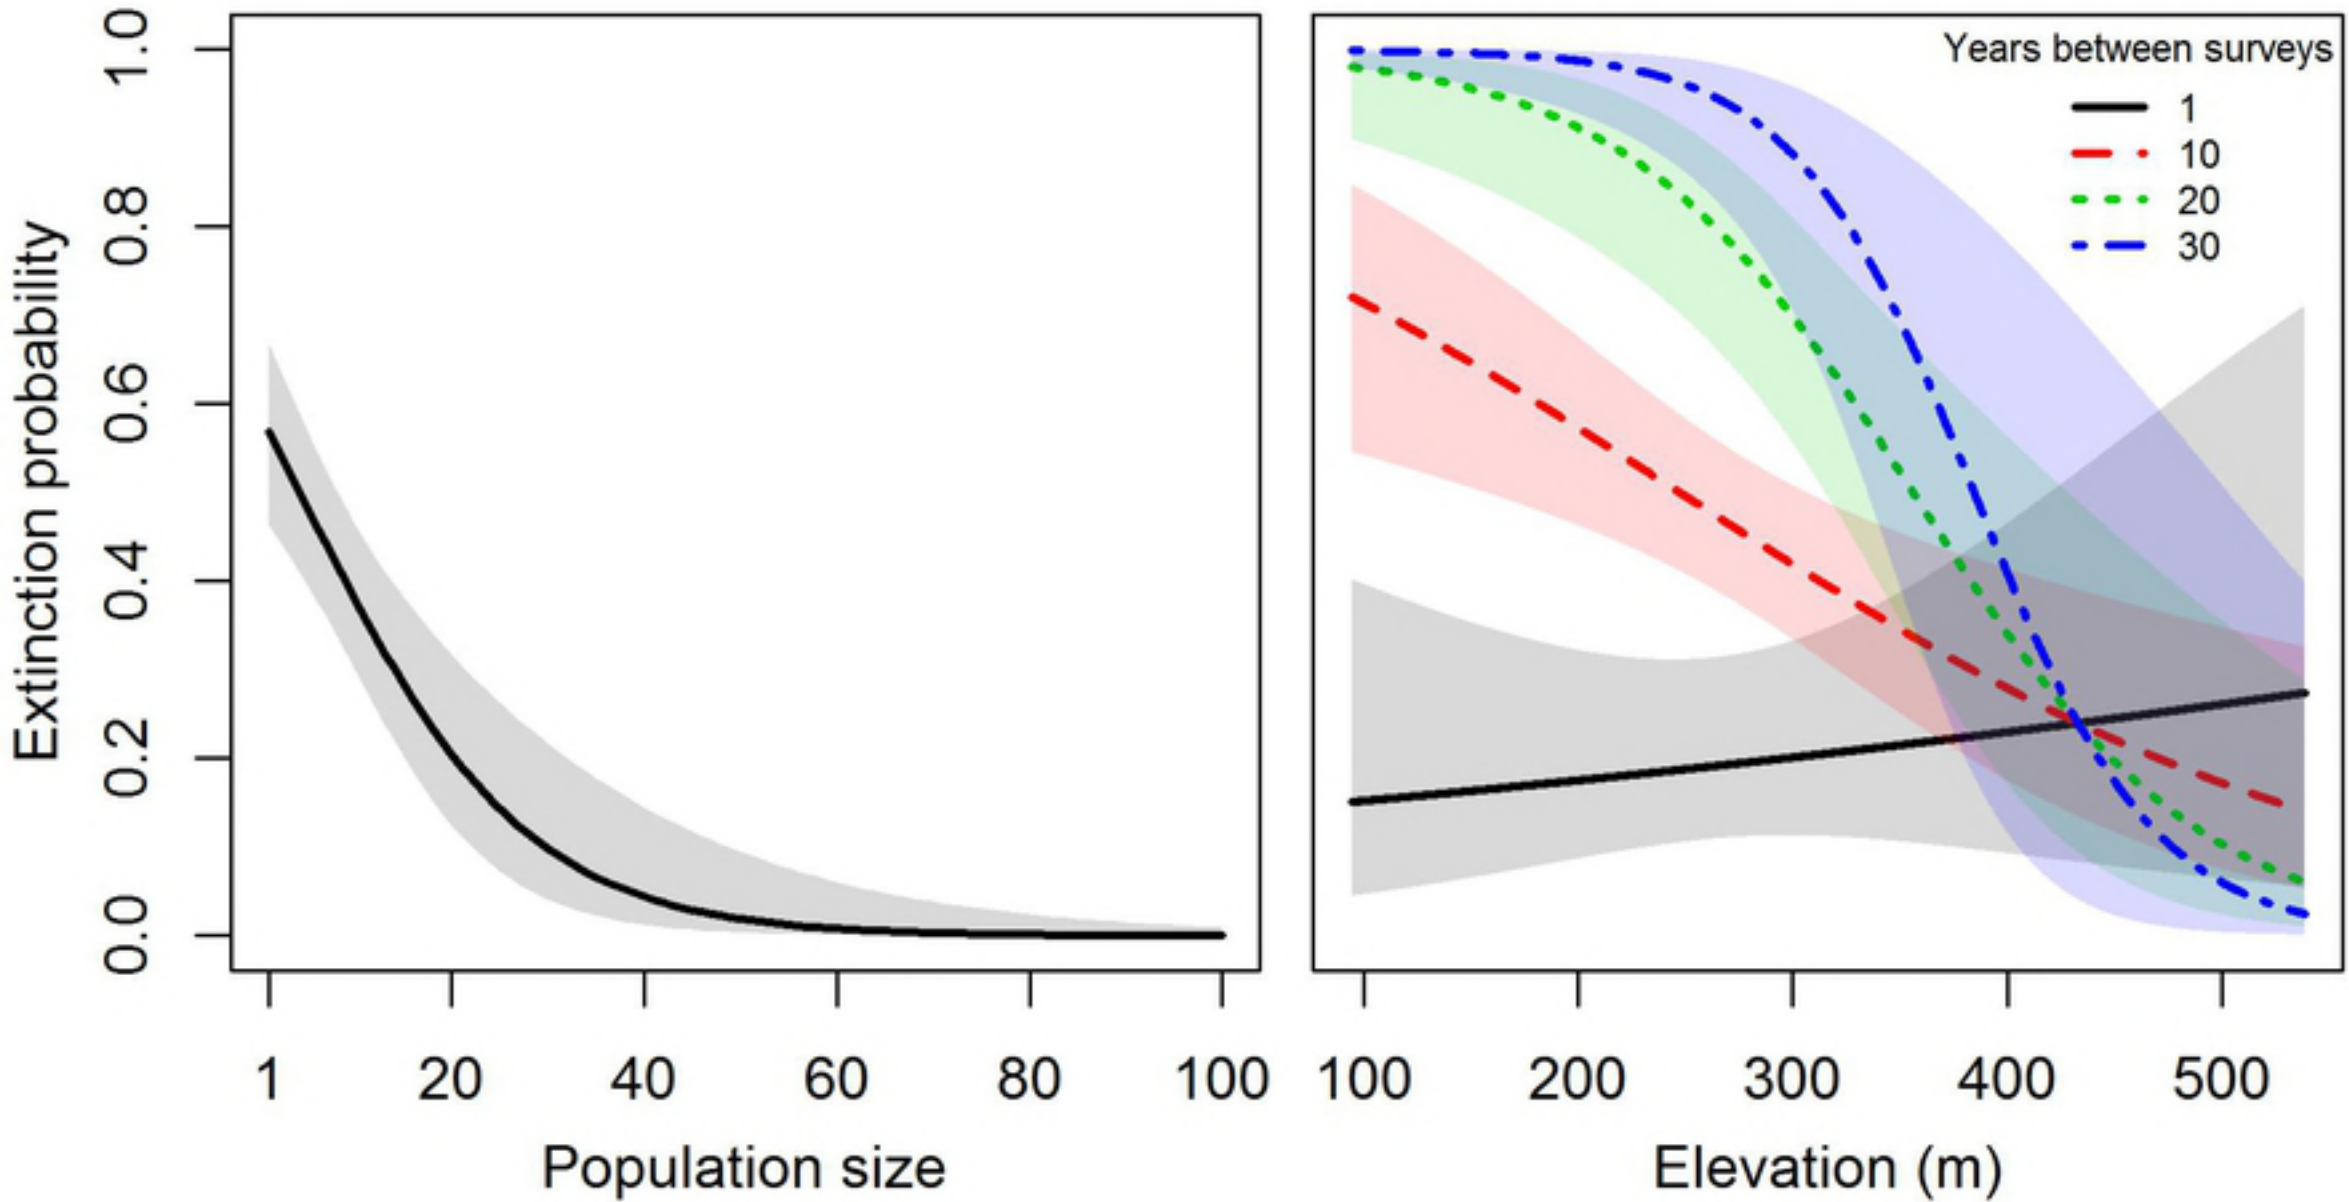

Figure 2



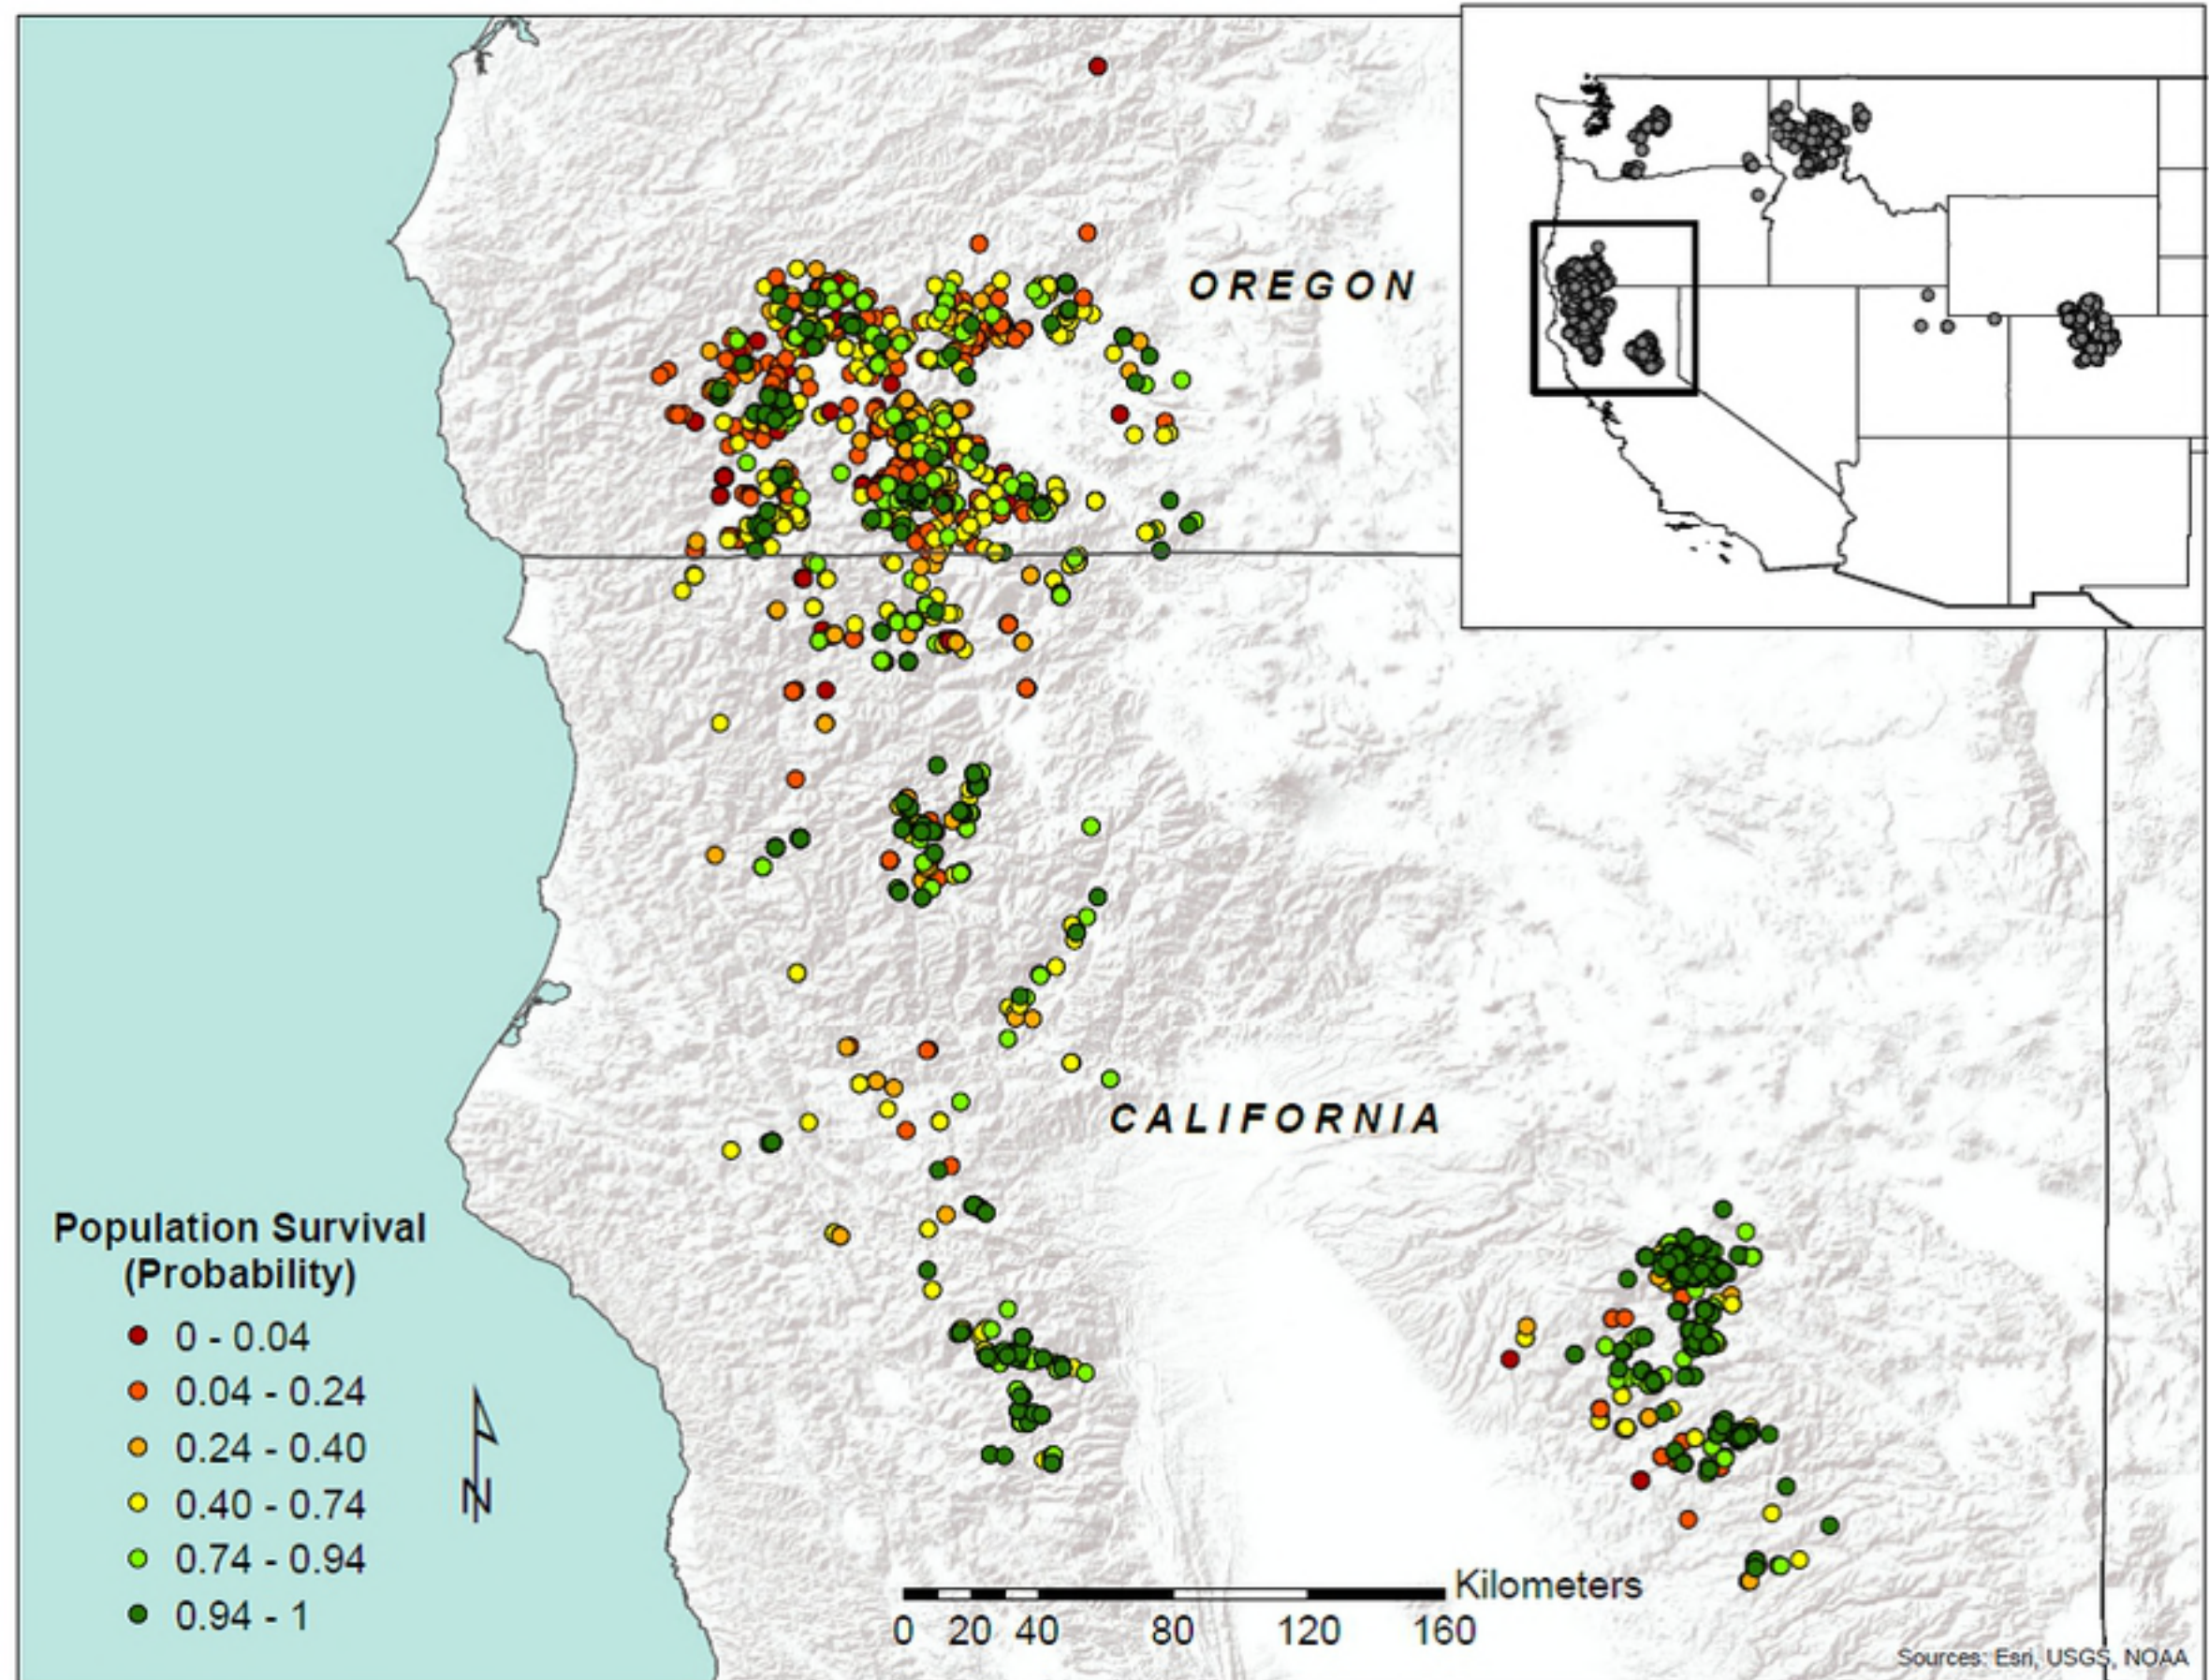

Figure 3



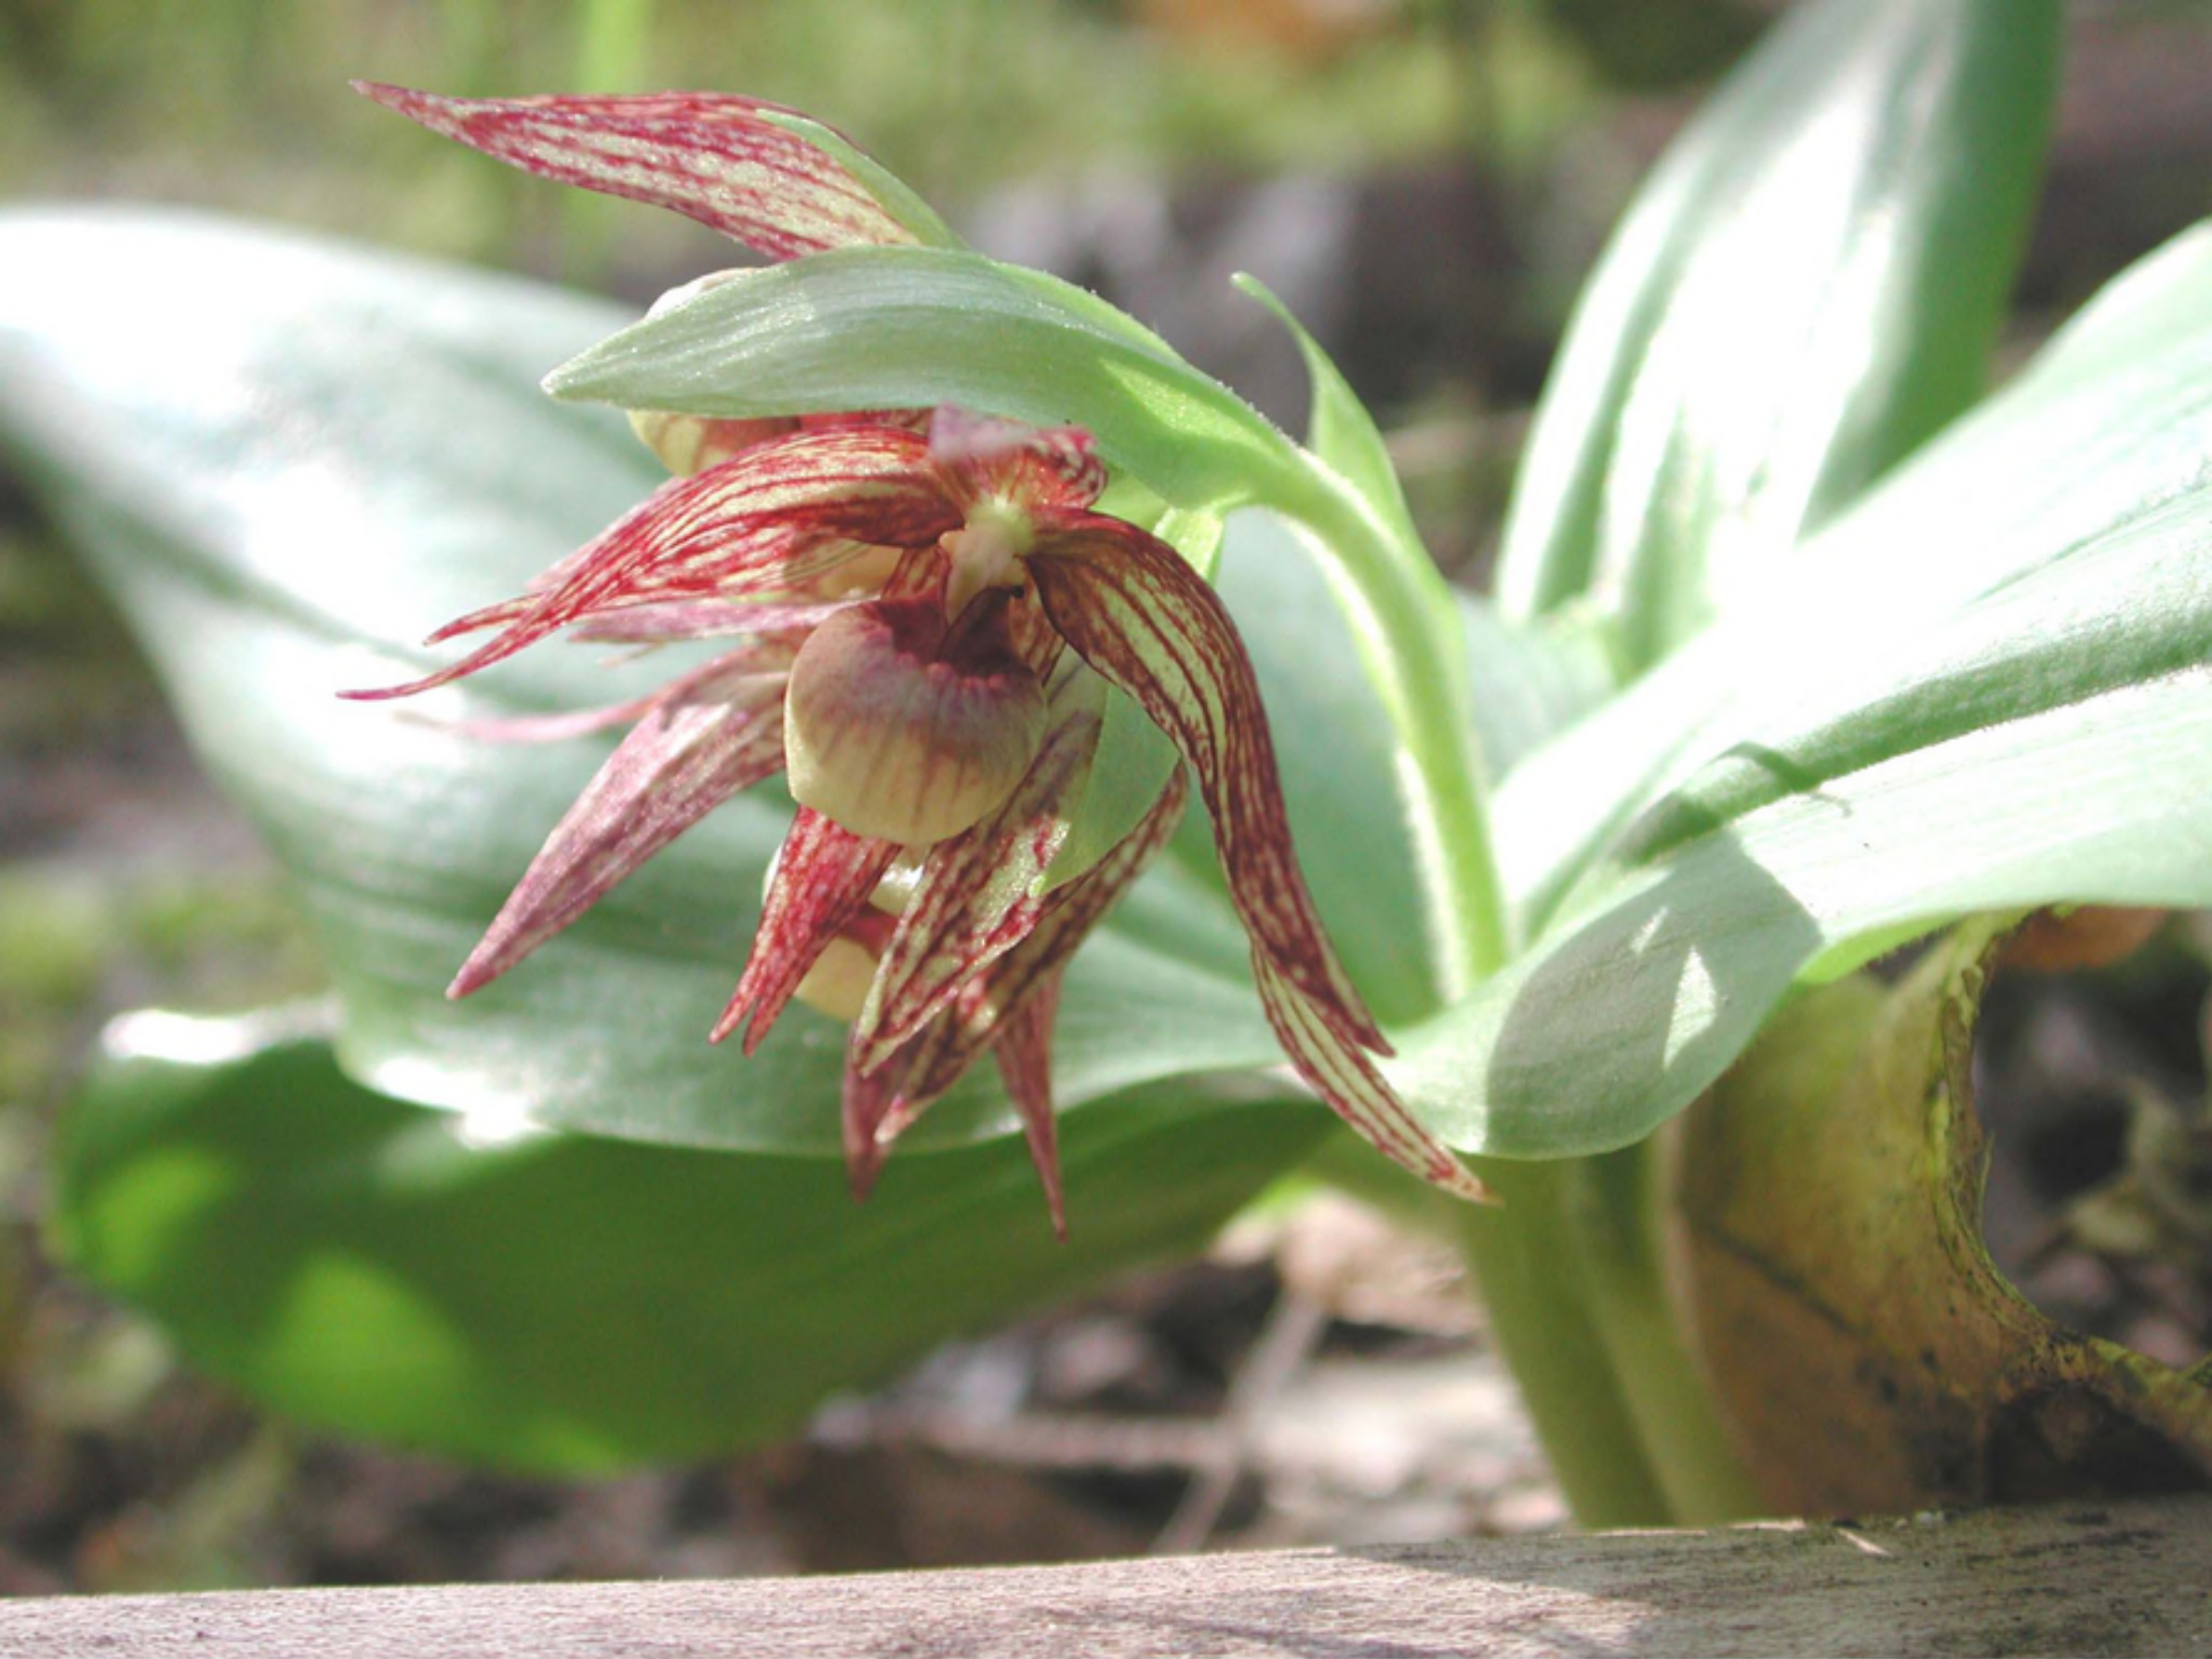

Figure 1
